# Supplementary material for: Amino acid modified copper electrodes for the enhanced selective electroreduction of carbon dioxide towards hydrocarbons
Source: Royal Society of Chemistry journal article supplement (doi:10.1039/c5ee03694a), 2016-01-01
Supplement: c5ee03694a1.pdf [file c5ee03694a1.pdf]

# Electronic Supplementary Information

## Amino Acid Modified Copper Electrodes for the Enhanced Selective Electroreduction of Carbon Dioxide towards Hydrocarbons

*Ming Shi Xie,<sup>a</sup> Bao Yu Xia,<sup>a</sup> Yawei Li,<sup>b</sup> Ya Yan,<sup>a</sup> Yanhui Yang,<sup>a</sup> Qiang Sun,<sup>b</sup> Siew Hwa Chan,<sup>c</sup> Adrian Fisher,<sup>d</sup> and Xin Wang<sup>\*a</sup>*

*<sup>a</sup> M. S. Xie, Dr. B. Y. Xia, Y. Yan, Prof Y. H. Yang, Prof. X. Wang*

*School of Chemical and Biomedical Engineering, Nanyang Technological University,*

*62 Nanyang Drive, Singapore 637459, Singapore*

*<sup>b</sup> Y. W. Li, Prof. Q. Sun*

*Singapore-Peking University Research Centre, Campus for Research Excellence & Technological Enterprise (CREATE), Singapore 138602, Singapore*

*Department of Materials Science and Engineering, Peking University, Beijing 100871, China*

*<sup>c</sup> Prof. S. H. Chan*

*School of Mechanical & Aerospace Engineering, Nanyang Technological University,*

*50 Nanyang Avenue, Singapore 639798, Singapore*

*<sup>d</sup> Prof. A. Fisher*

*Department of Chemical Engineering and Biotechnology, University of Cambridge, New Museums Site, Pembroke Street, Cambridge, CB2 3RA, UK*

‡ Mr. M. S. Xie, Dr. B. Y. Xia and Mr. Y. W. Li contributed equally to this work.

Correspondence and requests for materials should be addressed to Prof X. Wang: E-mail:

[WangXin@ntu.edu.sg](mailto:WangXin@ntu.edu.sg)

## Experimental details:

**Materials.** Potassium persulfate ( $\geq 99.0\%$ ), phosphoric acid ( $\geq 85$  wt. %), potassium bicarbonate (99.7%), 1-aminoanthraquinone (97%), sodium nitrite (97%), Acetonitrile (99%), and tetrabutylammonium tetrafluoroborate (99%) were purchased from Sigma-Aldrich. Glycine ( $\geq 99\%$ ), DL-alanine ( $\geq 99\%$ ), DL-leucine ( $\geq 99\%$ ), DL-tryptophan ( $\geq 99\%$ ), stearic acid ( $\geq 98.5$ ) were purchased from Sigma. Copper foil (0.025mm thick, 99.98%), DL-tyrosine (99%), DL-arginine ( $\geq 98\%$ ), 1-dodecyl mercaptan ( $\geq 98\%$ ) and o-nitroaniline (98%) were purchased from Aldrich. Sodium hydroxide (97%) was purchased from Alfa Aesar. Hydrochloric acid (37%) was purchased from Merck. Carbon dioxide gas (99.8%) was purchased from Air Liquide. Chemicals were all used without purification. Chemical bath and electrolyte solution were prepared with deionized water, which is produced by Milli-Q Gradient A10 system (Millipore).

**Thickness calculation.** The thickness of the film is estimated to be 0.8  $\mu\text{m}$  via the equation:  $\text{thickness} = Q \cdot M / nF\rho$  (Q: charge for reducing  $\text{Cu}(\text{OH})_2$  film per  $\text{cm}^2$ , in our test is  $\sim 0.55\text{C}$ ;  $M(\text{Cu}(\text{OH})_2) = 97.5\text{g mol}^{-1}$ ;  $n = 2$ ;  $\rho = 3.37\text{g cm}^{-3}$ ;  $F = 96485\text{C mol}^{-1}$ ).

**Electrochemical active surface measurements.** The electrochemically active surface area of electrodes was measured through determination of double-layer capacitance at various scan rates. CVs were obtained for a potential range in which only double-layer adsorption and desorption occurred. The current densities were obtained by integrating area of CV curves, and then plotted against the scan rates of the CV. The slope of the linear regression gave the capacitance. Cu NW film electrodes in 0.05 M  $\text{H}_2\text{SO}_4$  provided a capacitance of  $1.25\text{mF cm}^{-2}$ . As a comparison, polished Cu foils gave out a capacitance of  $1.15 \times 10^{-2}\text{mF cm}^{-2}$ .

**Current densities measurements.** A Cu disk electrode (diameter 2.0 mm) was polished with 0.01  $\mu\text{m}$  aluminum and washed with deionized water under ultrasonic condition. Cu disk electrodes were immersed

into 1.0 mM and 0.01 mM glycine solution for various duration (1 min or 15 mins) to prepare modified ones. Modified Cu disk electrodes and bare Cu disk electrodes were used for scanning between -0.4 V and -1.9 V vs. Ag/AgCl (scan rate:  $0.1 \text{ V s}^{-1}$ ) in 0.1 M  $\text{KHCO}_3$  solution, before test the electrolyte was bubbled by with  $\text{N}_2$  for 1 h.

**Table S1.** Faradaic Efficiencies of CO<sub>2</sub> electro-reduction products under different conditions.

| Electrode (vs. Ag/AgCl)                          | Faradaic efficiency (%) |                               |                               |                               |     |                |       |
|--------------------------------------------------|-------------------------|-------------------------------|-------------------------------|-------------------------------|-----|----------------|-------|
|                                                  | CH <sub>4</sub>         | C <sub>2</sub> H <sub>4</sub> | C <sub>2</sub> H <sub>6</sub> | C <sub>3</sub> H <sub>6</sub> | CO  | H <sub>2</sub> | Total |
| Cu NW film Gly (-1.9 V)                          | N/A                     | 12.7                          | 21.1                          | 0.3                           | 0.9 | 52.2           | 87.2  |
| Cu NW film Gly (-1.8 V)                          | N/A                     | 8.3                           | 18.0                          | 0.3                           | 1.0 | 69.3           | 97.0  |
| Cu NW film Gly (-1.7 V)                          | N/A                     | 5.1                           | 12.4                          | 0.3                           | 1.0 | 76.5           | 95.2  |
| Cu NW film Gly (-1.6 V)                          | N/A                     | 3.5                           | 8.4                           | 0.3                           | 1.1 | 77.4           | 90.7  |
| Cu NW film Gly (-1.5 V)                          | N/A                     | 2.1                           | 5.0                           | 0.2                           | 1.6 | 79.3           | 88.2  |
| Cu NW film Gly (-1.4 V)                          | N/A                     | 1.3                           | 3.3                           | 0.2                           | 2.0 | 85.4           | 92.3  |
| Cu NW film Gly (-1.3 V)                          | N/A                     | 0.8                           | 2.6                           | 0.2                           | 3.3 | 84.8           | 91.8  |
| Cu NW film (-1.9 V)                              | N/A                     | 5.9                           | 11.7                          | 0.2                           | 0.7 | 76.2           | 94.7  |
| Cu NW film (-1.8 V)                              | N/A                     | 5.3                           | 11.1                          | 0.2                           | 0.8 | 75.9           | 93.3  |
| Cu NW film (-1.7 V)                              | N/A                     | 4.0                           | 9.9                           | 0.3                           | 0.8 | 78.6           | 93.5  |
| Cu NW film (-1.6 V)                              | N/A                     | 3.0                           | 6.7                           | 0.2                           | 0.8 | 82.8           | 93.5  |
| Cu NW film (-1.5 V)                              | N/A                     | 2.3                           | 4.5                           | 0.2                           | 1.1 | 80.0           | 88.0  |
| Cu NW film (-1.4 V)                              | N/A                     | 1.4                           | 2.8                           | 0.2                           | 1.6 | 90.5           | 96.5  |
| Cu NW film (-1.3 V)                              | N/A                     | 0.7                           | 1.6                           | 0.2                           | 2.5 | 89.1           | 94.1  |
| Cu NW film Leu (-1.9 V)                          | N/A                     | 6.1                           | 13.0                          | 0.2                           | 0.6 | 72.4           | 92.4  |
| Cu NW film Trp (-1.9 V)                          | N/A                     | 8.8                           | 18.0                          | 0.3                           | 0.7 | 67.3           | 95.2  |
| Cu NW film Arg (-1.9 V)                          | N/A                     | 8.3                           | 15.1                          | 0.2                           | 0.7 | 63.2           | 87.5  |
| Cu NW film Ala (-1.9 V)                          | N/A                     | 8.8                           | 15.3                          | 0.2                           | 0.7 | 66.8           | 91.8  |
| Cu NW film Tyr (-1.9 V)                          | N/A                     | 8.8                           | 11.8                          | 0.3                           | 0.7 | 72.3           | 93.9  |
| Cu NW film Gly after 2 h (-1.9 V)                | N/A                     | 13.8                          | 20.0                          | 0.3                           | 0.5 | 63.2           | 97.8  |
| Cu NW film Gly after 3 h (-1.9 V)                | N/A                     | 12.8                          | 18.7                          | 0.3                           | 0.5 | 66.8           | 98.6  |
| Cu NW film Gly after 4 h (-1.9 V)                | N/A                     | 13.0                          | 19.1                          | 0.4                           | 1.0 | 65.2           | 98.7  |
| Cu NW film Gly after 5 h (-1.9 V)                | N/A                     | 12.7                          | 17.3                          | 0.7                           | 0.3 | 64.3           | 95.3  |
| Cu NW film Gly after 12 h (-1.9 V)               | N/A                     | 9.0                           | 13.4                          | 0.2                           | 3.2 | 70.9           | 96.7  |
| Cu NW film Gly 4×10 <sup>-6</sup> m mol (-1.9 V) | N/A                     | 8.0                           | 13.7                          | 0.2                           | 0.7 | 74.3           | 96.8  |
| Cu NW film Gly 2×10 <sup>-6</sup> m mol (-1.9 V) | N/A                     | 7.1                           | 16.8                          | 0.2                           | 0.7 | 69.7           | 94.4  |
| Cu NW film Gly 1×10 <sup>-4</sup> m mol (-1.9 V) | N/A                     | 5.3                           | 15.0                          | 0.1                           | 0.5 | 71.5           | 92.5  |
| Cu NW film Gly 4×10 <sup>-4</sup> m mol (-1.9 V) | N/A                     | 4.9                           | 9.3                           | 0.1                           | 0.5 | 79.3           | 94.2  |
| Cu NW film RCOOH (-1.9 V)                        | N/A                     | 3.7                           | 12.1                          | 0.1                           | 0.5 | 79.6           | 96.0  |

|                                            |      |      |      |     |      |      |      |
|--------------------------------------------|------|------|------|-----|------|------|------|
| Cu NW film PhNO <sub>2</sub> (-1.9 V)      | N/A  | 2.4  | 7.3  | 0.2 | 0.8  | 77.1 | 87.8 |
| Cu NW film AQ (-1.9 V)                     | N/A  | 1.9  | 6.7  | 0.2 | 0.7  | 83.1 | 92.6 |
| Cu NW film RSH (-1.9 V)                    | N/A  | 2.8  | 10.2 | 0.1 | 0.8  | 74.3 | 88.2 |
| Cu foil (-1.9 V)                           | 16.1 | 9.5  | N/A  | N/A | 1.1  | 66.8 | 93.5 |
| Cu foil (-1.8 V)                           | 8.8  | 8.2  | N/A  | N/A | 1.2  | 77.9 | 96.1 |
| Cu foil (-1.7 V)                           | 2.6  | 3.3  | N/A  | N/A | 1.9  | 84.8 | 92.6 |
| Cu foil (-1.6 V)                           | 1.6  | 1.9  | N/A  | N/A | 2.0  | 90.7 | 96.2 |
| Cu foil (-1.5 V)                           | 0.9  | 0.6  | N/A  | N/A | 14.9 | 71.4 | 87.8 |
| Cu foil Gly (-1.9 V)                       | 32.1 | 24.0 | N/A  | N/A | 0.6  | 34.7 | 91.5 |
| Cu foil Gly (-1.8 V)                       | 20.9 | 22.4 | N/A  | N/A | 1.0  | 43.9 | 88.1 |
| Cu foil Gly (-1.7 V)                       | 12.2 | 18.0 | N/A  | N/A | 4.1  | 56.5 | 90.9 |
| Cu foil Gly (-1.6 V)                       | 6.6  | 11.3 | N/A  | N/A | 6.9  | 71.3 | 96.1 |
| Cu foil Gly (-1.5 V)                       | 4.3  | 6.9  | N/A  | N/A | 5.8  | 71.3 | 88.3 |
| Cu foil Leu (-1.9 V)                       | 16.5 | 9.0  | N/A  | N/A | 1.0  | 65.2 | 91.6 |
| Cu foil Leu (-1.8 V)                       | 12.0 | 10.2 | N/A  | N/A | 1.7  | 65.8 | 89.6 |
| Cu foil Leu (-1.7 V)                       | 6.0  | 6.6  | N/A  | N/A | 2.5  | 73.4 | 88.5 |
| Cu foil Leu (-1.6 V)                       | 3.0  | 3.6  | N/A  | N/A | 4.8  | 81.8 | 93.2 |
| Cu foil Leu (-1.5 V)                       | 1.9  | 2.0  | N/A  | N/A | 7.9  | 76.6 | 88.4 |
| Cu foil Tyr (-1.9 V)                       | 21.3 | 13.9 | N/A  | N/A | 0.8  | 57.0 | 93.1 |
| Cu foil Tyr (-1.8 V)                       | 12.8 | 12.8 | N/A  | N/A | 1.1  | 60.5 | 87.2 |
| Cu foil Tyr (-1.7 V)                       | 9.7  | 12.4 | N/A  | N/A | 1.7  | 67.6 | 91.4 |
| Cu foil Tyr (-1.6 V)                       | 5.7  | 9.1  | N/A  | N/A | 2.5  | 75.0 | 92.3 |
| Cu foil Tyr (-1.5 V)                       | 3.6  | 6.0  | N/A  | N/A | 3.2  | 76.3 | 89.1 |
| Cu foil Arg (-1.9 V)                       | 24.3 | 15.9 | N/A  | N/A | 1.0  | 47.1 | 88.4 |
| Cu foil Arg (-1.8 V)                       | 21.7 | 17.3 | N/A  | N/A | 0.8  | 55.1 | 94.9 |
| Cu foil Arg (-1.7 V)                       | 14.2 | 15.0 | N/A  | N/A | 3.5  | 56.8 | 89.5 |
| Cu foil Arg (-1.6 V)                       | 9.4  | 9.8  | N/A  | N/A | 4.3  | 71.5 | 95.1 |
| Cu foil Arg (-1.5 V)                       | 4.8  | 5.1  | N/A  | N/A | 3.6  | 74.1 | 87.6 |
| Cu foil Ala (-1.9 V)                       | 25.5 | 18.4 | N/A  | N/A | 2.9  | 41.6 | 88.4 |
| Cu foil Ala (-1.8 V)                       | 19.5 | 18.3 | N/A  | N/A | 1.0  | 56.4 | 95.1 |
| Cu foil Ala (-1.7 V)                       | 14.5 | 15.2 | N/A  | N/A | 2.5  | 63.1 | 95.2 |
| Cu foil Ala (-1.6 V)                       | 7.5  | 9.5  | N/A  | N/A | 6.6  | 70.9 | 94.4 |
| Cu foil Ala (-1.5 V)                       | 4.9  | 5.7  | N/A  | N/A | 5.9  | 79.4 | 96.0 |
| Cu foil Trp (-1.9 V)                       | 28.6 | 11.1 | N/A  | N/A | 1.3  | 48.0 | 89.0 |
| Cu foil Trp (-1.8 V)                       | 29.3 | 11.8 | N/A  | N/A | 2.4  | 46.7 | 90.3 |
| Cu foil Trp (-1.7 V)                       | 19.1 | 11.5 | N/A  | N/A | 4.2  | 60.2 | 95.0 |
| Cu foil Trp (-1.6 V)                       | 6.0  | 5.7  | N/A  | N/A | 4.4  | 79.0 | 95.2 |
| Cu foil Trp (-1.5 V)                       | 5.2  | 4.6  | N/A  | N/A | 6.1  | 71.2 | 87.0 |
| Cu foil Gly 5×10 <sup>-6</sup> m mol (-1.9 | 7.1  | 16.8 | N/A  | N/A | 1.1  | 63.7 | 88.7 |

|                                               |      |      |     |     |      |      |      |
|-----------------------------------------------|------|------|-----|-----|------|------|------|
| V)                                            |      |      |     |     |      |      |      |
| Cu foil Gly $5 \times 10^{-8}$ m mol (-1.9 V) | 27.3 | 17.6 | N/A | N/A | 1.1  | 46.4 | 92.4 |
| Cu foil RCOOH (-1.9 V)                        | 12.4 | 10.4 | N/A | N/A | 3.9  | 65.6 | 92.3 |
| Cu foil PhNO <sub>2</sub> (-1.9 V)            | 7.3  | 5.2  | N/A | N/A | 1.9  | 80.6 | 94.9 |
| Cu foil AQ (-1.9 V)                           | 7.7  | 5.1  | N/A | N/A | 3.5  | 74.6 | 90.9 |
| Cu foil RSH (-1.9 V)                          | 13.2 | 9.0  | N/A | N/A | 1.8  | 71.0 | 95.1 |
| Annealed Cu Gly (-1.9 V)                      | 5.3  | 19.7 | 0.3 | N/A | 1.1  | 61.2 | 87.6 |
| Annealed Cu Gly (-1.8 V)                      | 4.5  | 21.3 | 0.4 | N/A | 1.1  | 66.5 | 93.9 |
| Annealed Cu Gly (-1.7 V)                      | 2.8  | 18.6 | 0.4 | N/A | 1.4  | 65.0 | 88.2 |
| Annealed Cu Gly (-1.6 V)                      | 1.8  | 14.6 | 0.5 | N/A | 2.8  | 71.2 | 90.9 |
| Annealed Cu Gly (-1.5 V)                      | 1.7  | 11.9 | 0.6 | N/A | 2.9  | 78.1 | 95.3 |
| Annealed Cu Gly (-1.4 V)                      | 1.1  | 7.4  | 0.6 | N/A | 3.9  | 78.4 | 91.5 |
| Annealed Cu Gly (-1.3 V)                      | 1.3  | 5.6  | 0.8 | N/A | 7.5  | 79.7 | 94.8 |
| Annealed Cu (-1.9 V)                          | 0.6  | 7.0  | 0.5 | N/A | 1.2  | 86.8 | 96.0 |
| Annealed Cu (-1.8 V)                          | 0.6  | 8.9  | 0.7 | N/A | 1.1  | 84.3 | 95.7 |
| Annealed Cu (-1.7 V)                          | 0.4  | 8.8  | 1.0 | N/A | 2.1  | 78.6 | 91.0 |
| Annealed Cu (-1.6 V)                          | 0.4  | 7.5  | 1.1 | N/A | 3.0  | 80.0 | 92.1 |
| Annealed Cu (-1.5 V)                          | 0.4  | 6.0  | 1.3 | N/A | 3.4  | 79.0 | 90.1 |
| Annealed Cu (-1.4 V)                          | 0.5  | 4.5  | 1.3 | N/A | 6.6  | 82.2 | 95.1 |
| Annealed Cu (-1.3 V)                          | 0.8  | 3.8  | 1.4 | N/A | 12.9 | 71.1 | 90.0 |
| Annealed Cu Arg (-1.9 V)                      | 5.9  | 12.6 | 0.2 | N/A | 1.0  | 76.9 | 96.6 |
| Annealed Cu Leu (-1.9 V)                      | 1.3  | 9.4  | 0.5 | N/A | 1.2  | 79.2 | 91.5 |
| Annealed Cu Tyr (-1.9 V)                      | 2.3  | 10.8 | 0.5 | N/A | 1.2  | 75.8 | 90.6 |
| Annealed Cu Trp (-1.9 V)                      | 1.5  | 18.7 | 1.1 | N/A | 1.3  | 67.5 | 90.0 |
| Annealed Cu Ala (-1.9 V)                      | 2.8  | 18.1 | 0.7 | N/A | 1.3  | 67.3 | 90.3 |

**Table S2.** FEs of hydrocarbon products on various kinds of Cu electrodes.

| Electrodes                                           | Potential<br>(V, vs.<br>Ag/AgCl) | Faraday efficiency (%) |                               |                               |                               | Reference                                                         |
|------------------------------------------------------|----------------------------------|------------------------|-------------------------------|-------------------------------|-------------------------------|-------------------------------------------------------------------|
|                                                      |                                  | CH <sub>4</sub>        | C <sub>2</sub> H <sub>4</sub> | C <sub>2</sub> H <sub>6</sub> | C <sub>3</sub> H <sub>6</sub> |                                                                   |
| Cu foil+Gly                                          | -1.9                             | 32                     | 24                            | N/A                           | N/A                           | This work                                                         |
| Cu NW+Gly                                            | -1.9                             | N/A                    | 6.7                           | 13                            | 0.16                          |                                                                   |
| Annealed<br>Cu+Gly                                   | -1.9                             | 5.3                    | 20                            | 0.4                           | N/A                           |                                                                   |
| Cu foil                                              | -2.1                             | 20                     | 4                             | N/A                           | N/A                           | <i>Electrochimica Acta</i> ,<br><b>2001</b> , 46, 3015–3022       |
| Cu nanofoam                                          | -1.7                             | 0.2                    | 1.4                           | 1.2                           | 0.1                           | <i>ACS Catal</i> , <b>2014</b> , 4,<br>3091–3095                  |
| Reduction Cu <sub>2</sub> O<br>film                  | -1.6                             | N/A                    | 4                             | 7                             | N/A                           | <i>J Am Chem Soc</i> , <b>2012</b> ,<br>134, 7231–7234            |
| Carbon-<br>supported Cu                              | -1.8                             | 18                     | 38                            | N/A                           | N/A                           | <i>ACS Catal</i> , <b>2014</b> , 4,<br>3682–3695                  |
| copper<br>electrodeposits                            | -1.9                             | N/A                    | 10                            | 3                             | N/A                           | <i>Electrochimica Acta</i> ,<br><b>2013</b> , 102, 388–392        |
| Cu <sub>2</sub> O-derived<br>copper<br>nanoparticles | -1.75                            | 3                      | 19                            | 2                             | N/A                           | <i>Phys Chem Chem<br/>Phys</i> , <b>2014</b> , 16,<br>12194-12201 |
| Nanoparticles<br>covered Cu                          | -1.75                            | 2                      | 36                            | N/A                           | N/A                           | <i>Phys Chem Chem. Phys</i> ,<br><b>2012</b> , 14, 76–81          |
| Sputtered Cu                                         | -1.75                            | 7                      | 22                            | 1                             | N/A                           | <i>Phys Chem Chem<br/>Phys</i> , <b>2012</b> , 14, 76–81          |
| Cu nanoparticles<br>5-15 nm                          | -1.75                            | 15                     | 7                             | N/A                           | N/A                           | <i>J Am Chem Soc</i> , <b>2014</b> ,<br>136, 6978–6986            |
| Cu overlayers<br>on Pt                               | -1.65                            | 7                      | N/A                           | N/A                           | N/A                           | <i>J Phys Chem C</i> , <b>2013</b> ,<br>117, 20500–20508          |
| Cu(111) single<br>crystals                           | -1.9                             | 24                     | 3                             | N/A                           | N/A                           | <i>Electrocatal</i> , <b>2012</b> , 3,<br>139–146                 |

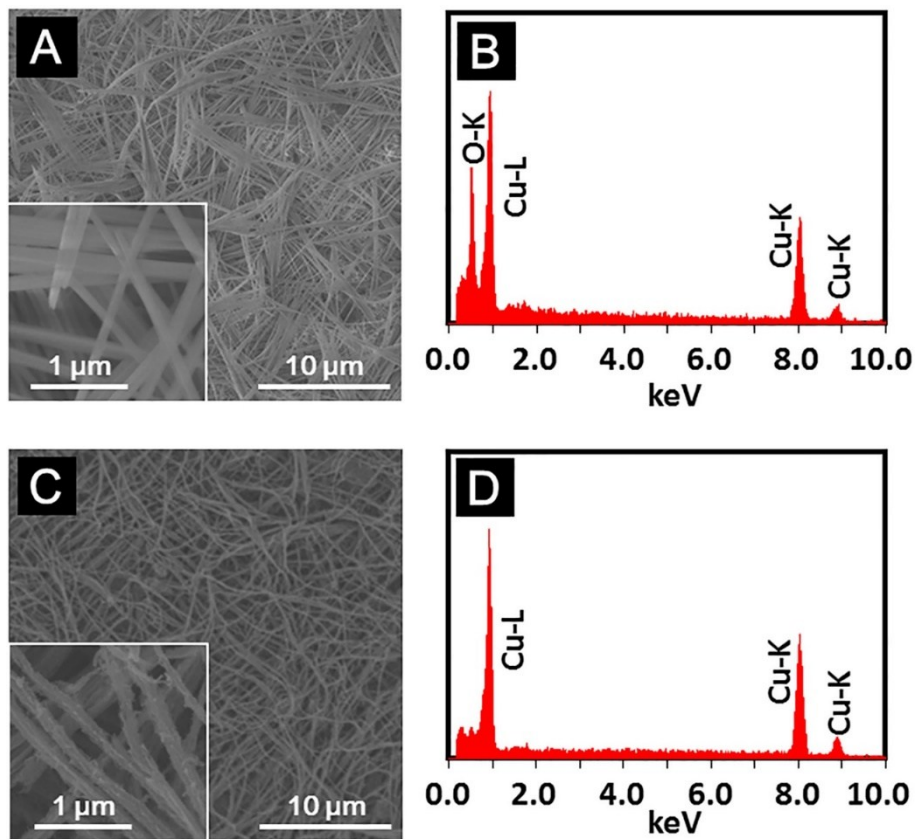

**Figure S1.** FESEM images and EDX patterns of  $\text{Cu}(\text{OH})_2$  (A, B) and Cu NW film (C, D).



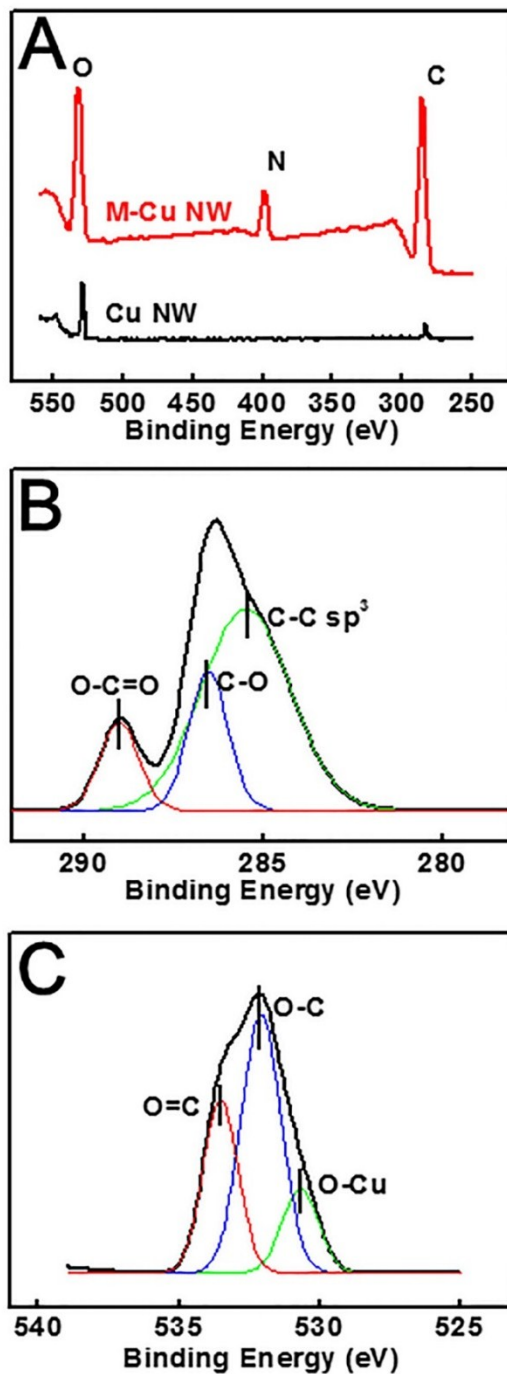

**Figure S2.** XPS patterns of Cu NW film and modified Cu NW film (pre-electrolysis). (A) Comparison on full range, (B) C1s scan and (C) O1s scan.

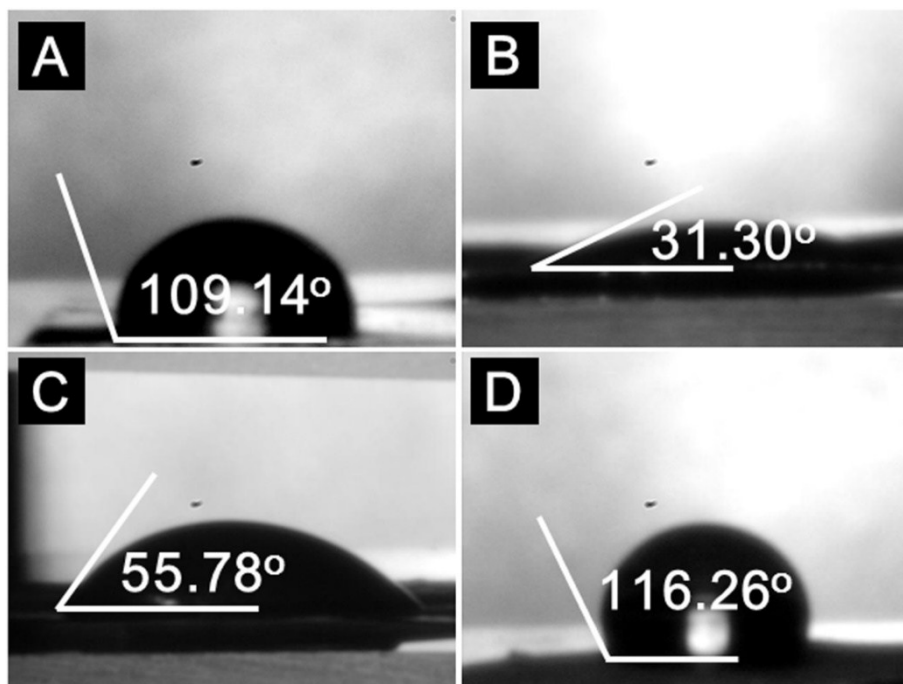

**Figure S3.** Contact angles of Cu foil (A), Cu NW film (B), 20 μL 1mM glycine modified Cu NW film (C), large amount of glycine modified Cu NW film (D).

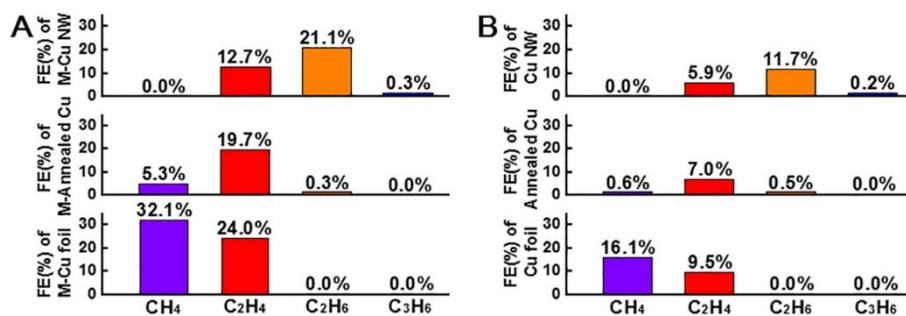

**Figure S4.** (A) Faradic efficiencies of hydrocarbons for different bare Cu (A) and modified Cu (B) electrodes.

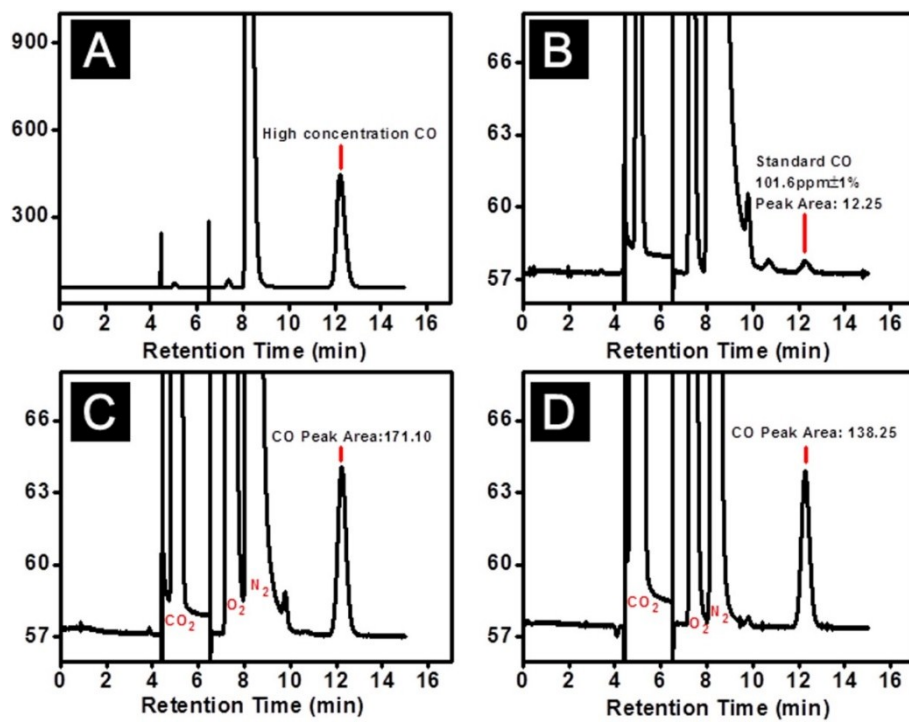

**Figure S5.** GC measurements of CO. (A) High concentration of CO, around 10%. (B) Standard sample of HCOOH, with a concentration of 101.6ppm±1%. (C) Sample of modified Cu NW Film. (D) Sample of Cu NW Film.

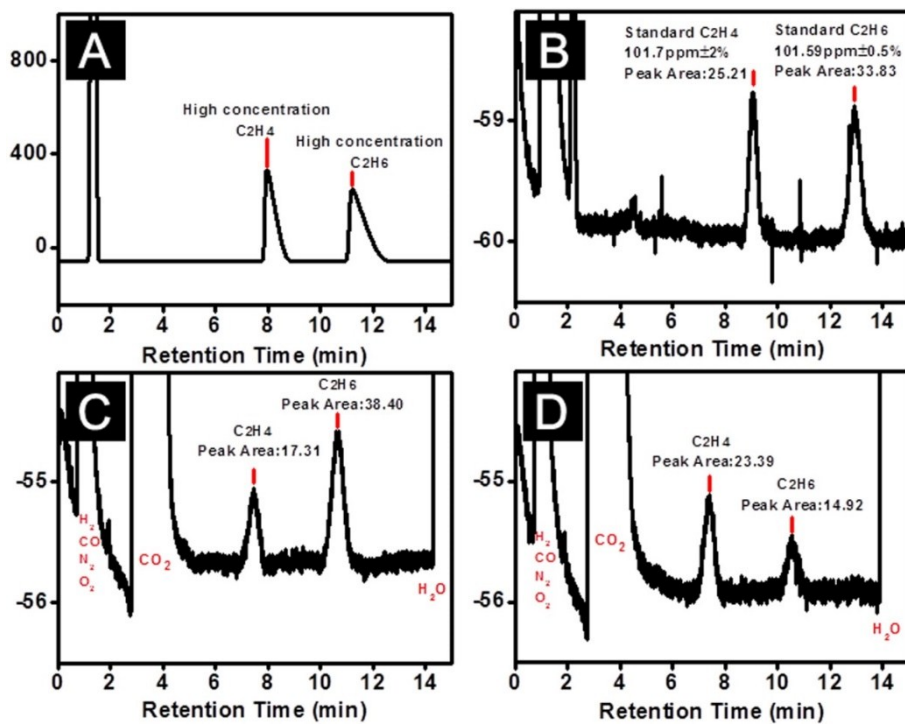

**Figure S6.** GC measurements of  $C_2H_4$  and  $C_2H_6$ . (A) High concentration of  $C_2H_4$  and  $C_2H_6$ , all around 5%. (B) Standard sample of  $C_2H_4$  and  $C_2H_6$ , with a concentration of  $101.7\text{ppm}\pm 2\%$ ,  $101.59\text{ppm}\pm 0.5\%$ , respectively. (C) Sample of modified Cu NW Film. (D) Sample of Cu NW Film.

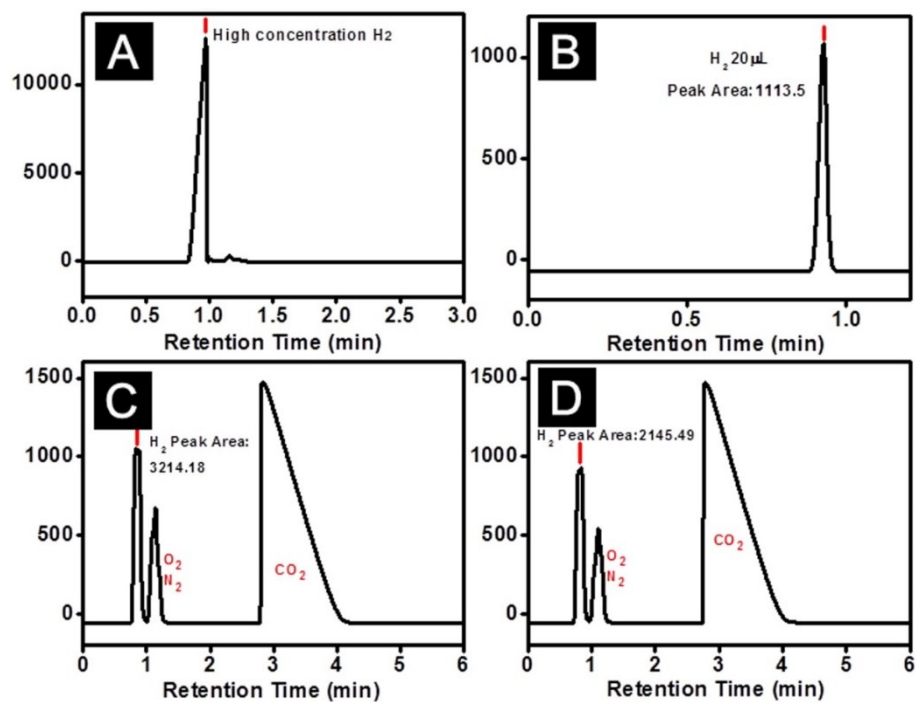

**Figure S7.** GC measurements of H<sub>2</sub>. (A) High concentration of H<sub>2</sub> almost 100%. (B) Standard sample of H<sub>2</sub>, with a concentration of 4000ppm. (C) Sample of modified Cu NW Film. (D) Sample of Cu NW Film.

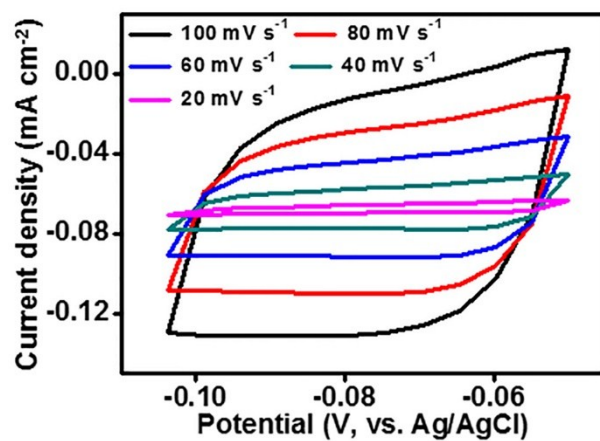

**Figure S8.** CVs of Cu NW film electrodes at various scan rates with double-layer charging and discharging, in a solution of 0.05 M H<sub>2</sub>SO<sub>4</sub> solution.

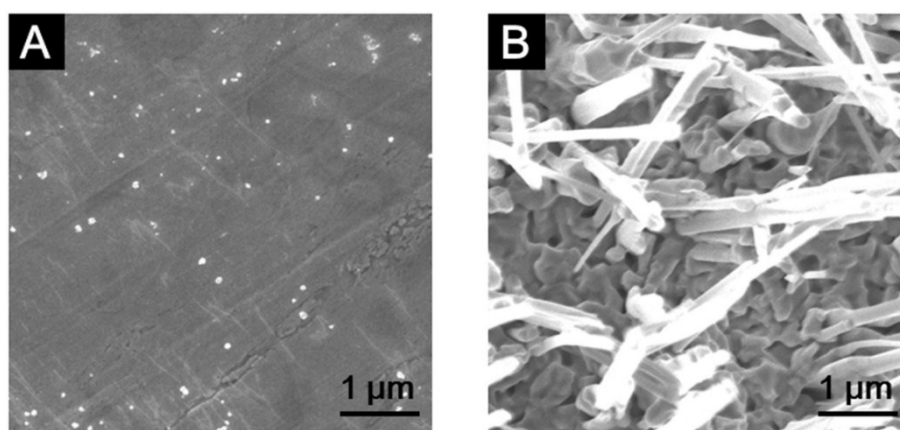

**Figure S9.** FESEM images of polished Cu foil (A) and annealed Cu (B).

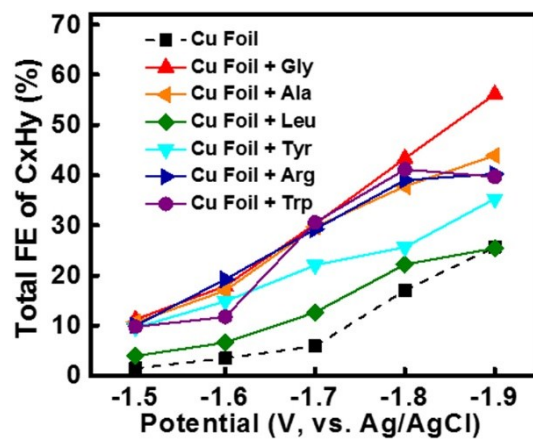

**Figure S10.** Total FEs of hydrocarbons on Cu foil electrodes modified with various amino acids in full potential range.

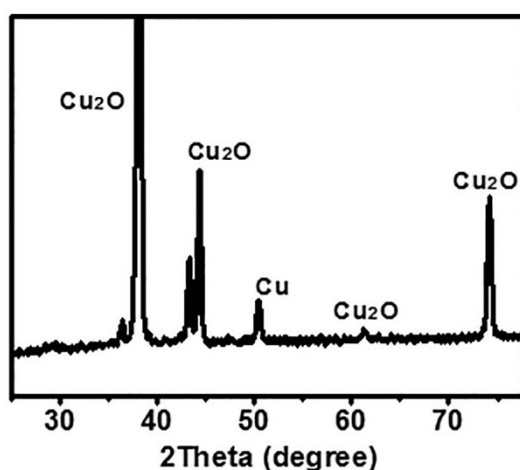

**Figure S11.** XRD pattern of annealed Cu ( $\text{Cu}_2\text{O}$  layer).

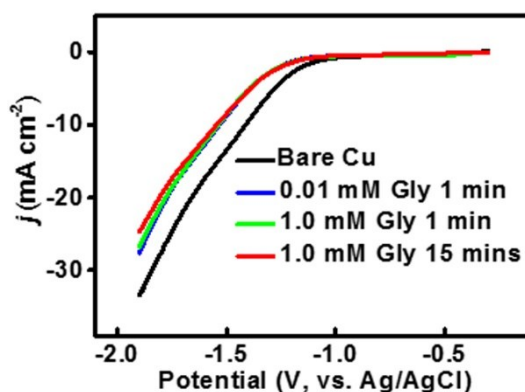

**Figure S12.** Linear sweep voltammograms for the bare and modified Cu disk electrodes (2.0 mm in diameter) in  $\text{N}_2$  bubbled 0.1  $\text{KHCO}_3$  solution. Range: -0.4 V ~ -1.9 V vs. Ag/AgCl. Scan rate:  $0.1 \text{ V s}^{-1}$ .

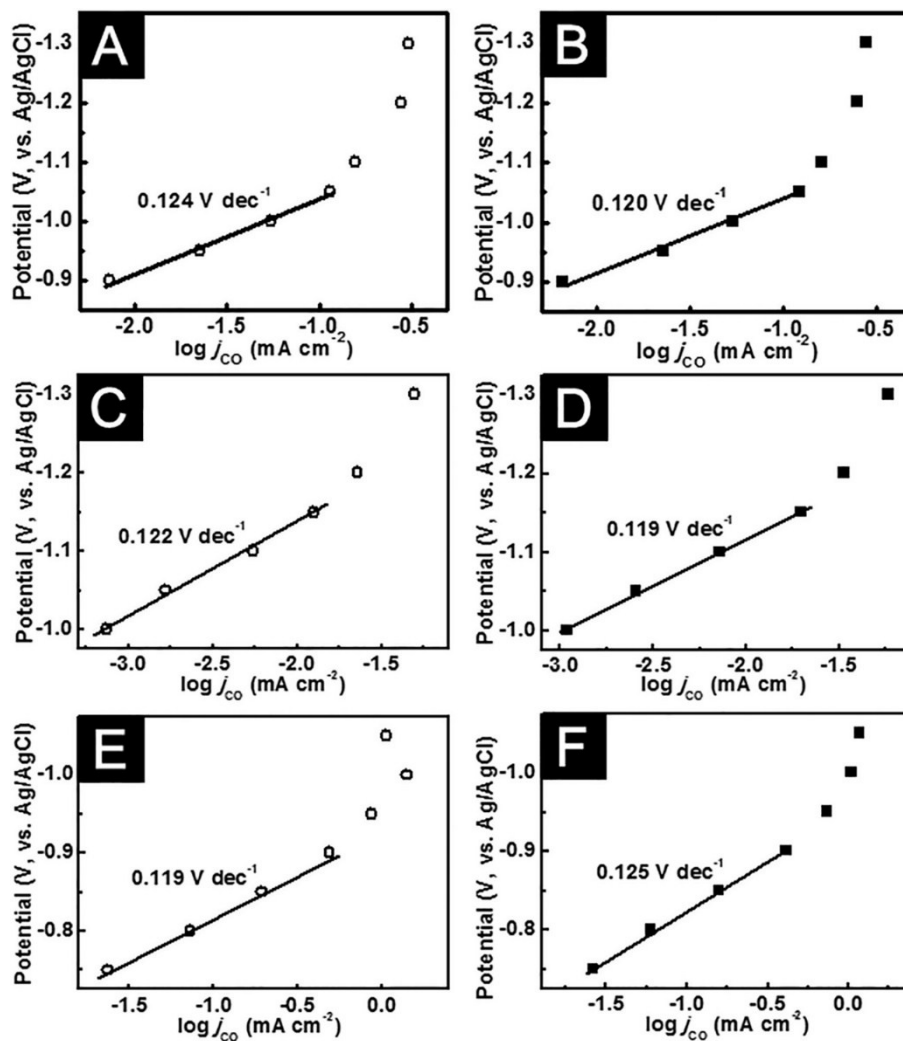

**Figure S13.** CO partial current density Tafel plots for Cu NW film electrode(A) and modified Cu NW film electrode(B) CO partial current density Tafel plots for Cu foil electrode (C), modified Cu foil electrode (D), annealed Cu electrode (E) and modified annealed Cu electrode (F).



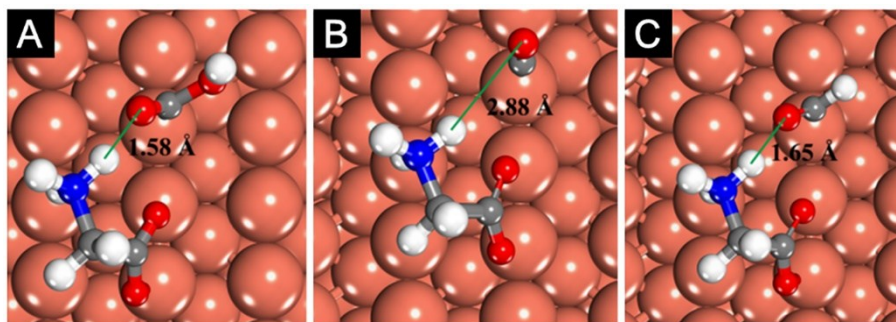

**Figure S14.** Hydrogen-bond like interaction between adsorbed amino acid and: (A) COOH\*; (B) CO\*; (C) CHO\*.

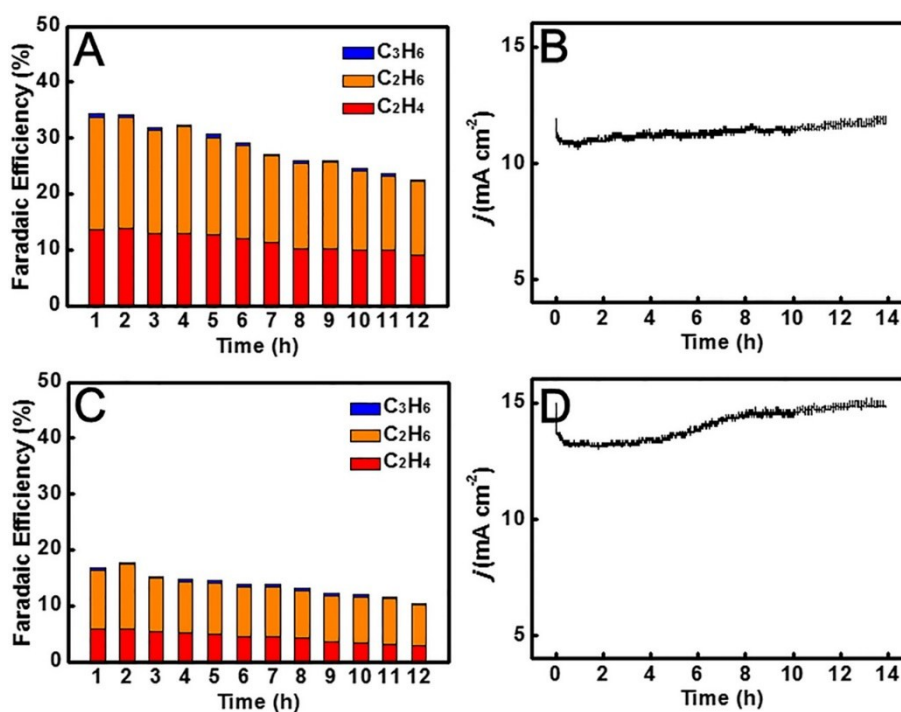

**Figure S15.** Electrocatalytic stability of modified Cu NW film (A, B) and bare Cu NW film (C, D) in CO<sub>2</sub> saturated KHCO<sub>3</sub> solution at -1.9 V: (A, C) Faradaic efficiencies; (B, D) the response of current density.

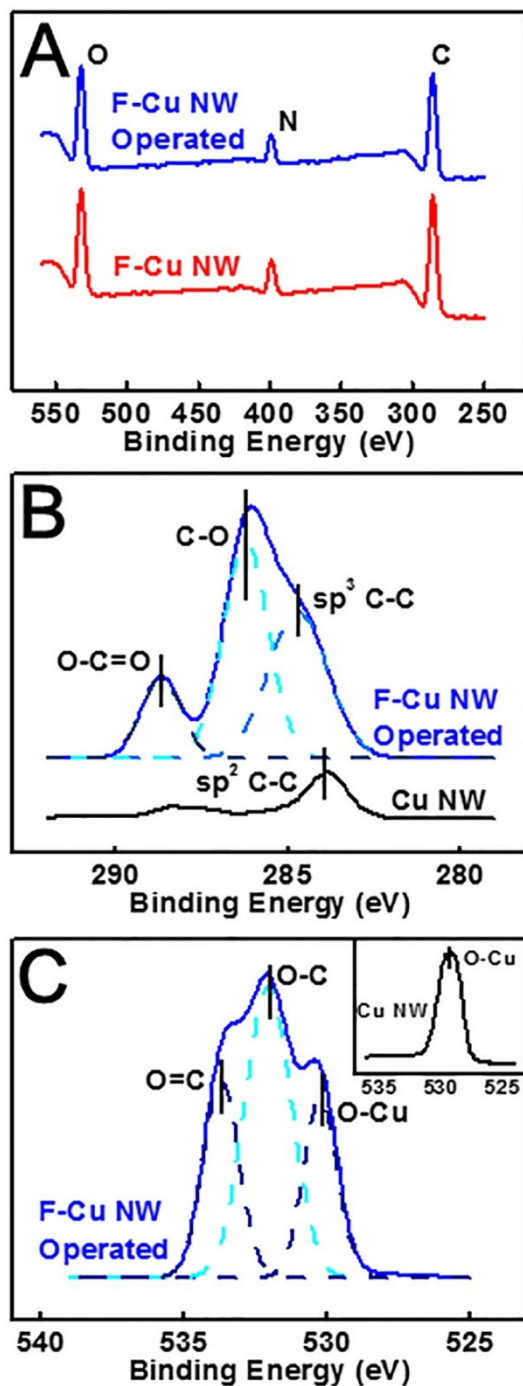

**Figure S16.** XPS patterns of the modified Cu NW film, after long time electrolysis at -1.9 V. (A) Comparison in full range, (B) C1s scan and (D) O1s scan.

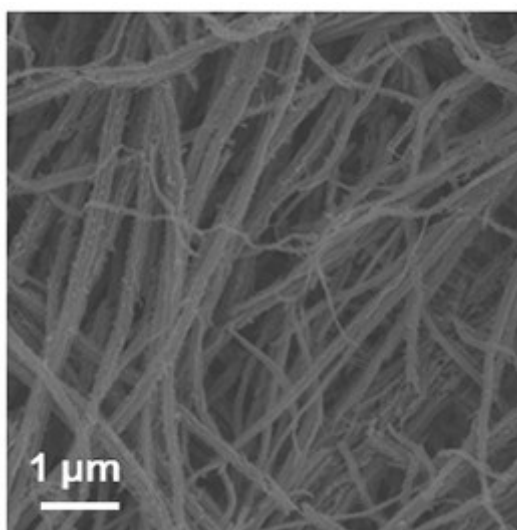

**Figure S17.** (A) FESEM image of the modified Cu NW film surface after long time electrolysis at -1.8 V.
